# Supplementary material for: Periostin-binding DNA aptamer treatment attenuates renal fibrosis under diabetic conditions
Source: PubMed Central journal article supplement (PMC5561139; doi:10.1038/s41598-017-09238-6), 2017-08-17
Supplement: 41598_2017_9238_MOESM1_ESM.pdf [file 41598_2017_9238_MOESM1_ESM.pdf]

## Supplementary Information

### Periostin-binding DNA aptamer treatment attenuates renal fibrosis under diabetic conditions

*Jae Eun Um<sup>1\*</sup>, Jung Tak Park<sup>2\*</sup>, Bo Young Nam<sup>1</sup>, Jung Pyo Lee<sup>3</sup>,  
Jong Ha Jung<sup>4</sup>, Youndong Kim<sup>4</sup>, Seonghun Kim<sup>2</sup>, Jimin Park<sup>2</sup>, Meiyang Wu<sup>2</sup>,  
Seung Hyeok Han<sup>2</sup>, Tae-Hyun Yoo<sup>2</sup>, and Shin-Wook Kang<sup>2</sup>*

<sup>1</sup>Severance Biomedical Science Institute, College of Medicine, Yonsei University, Seoul, Korea, <sup>2</sup>Department of Internal Medicine, College of Medicine, Severance Biomedical Science Institute, Brain Korea 21 PLUS, Institute of Kidney Disease Research, Yonsei University, Seoul, Korea, <sup>3</sup>Department of Internal Medicine, Seoul National University Boramae Medical Center, Seoul, Korea, <sup>4</sup>Aptamer Sciences Inc., POSTECH Biotech Center, Pohang, Gyeongbuk, Korea

#### Correspondence to:

Shin-Wook Kang, MD, PhD

Yonsei University College of Medicine, Department of Internal Medicine

134 Shinchon-Dong, Seodaemun-Gu, Seoul, Korea, 120-752; Phone 82-2-361-5428; FAX 82-2-393-6884; [kswkidney@yuhs.ac](mailto:kswkidney@yuhs.ac)

## Supplementary Figure 1

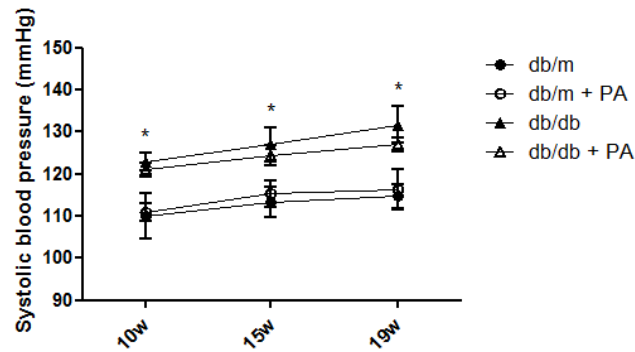

**Supplementary Figure 1. Effect of periostin-binding DNA aptamer (PA) (500  $\mu$ g/kg/d) on blood pressure in db/db and db/m mice.** Time course of systolic blood pressure changes of *db/db* and *db/m* mouse groups. The systolic blood pressure was significantly elevated in *db/db* mice compared to *db/m* mice at 10, 15, and 19 weeks of age. The treatment of PA did not have a significantly effect on blood pressure in both *db/db* and *db/m* mice (n = 6 each group).

PA, periostin-binding DNA aptamer; W, weeks. \*,  $P < 0.05$  vs. *db/m*

## Supplementary Figure 2

Fig.1B

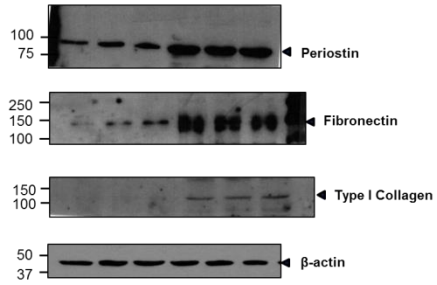

**Supplementary Figure 2.** Wider (uncropped) scans of blots (Figure 1B).

### Supplementary Figure 3

Fig.2B

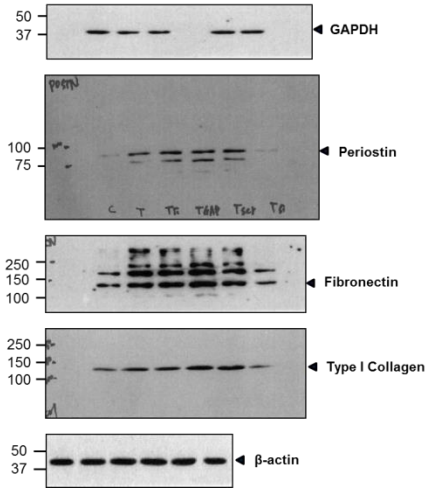

**Supplementary Figure 2.** Wider (uncropped) scans of blots (Figure 2B).

## Supplementary Figure 4

Fig.4B

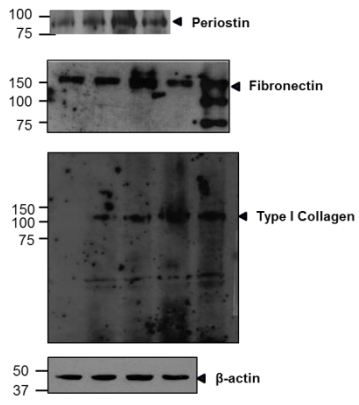

**Supplementary Figure 3.** Wider (uncropped) scans of blots (Figure 4B).

## Supplementary Figure 5

Fig.5B UNXSTZ

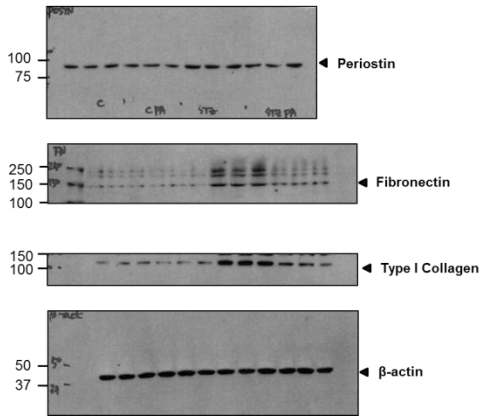

Fig.5B db/db

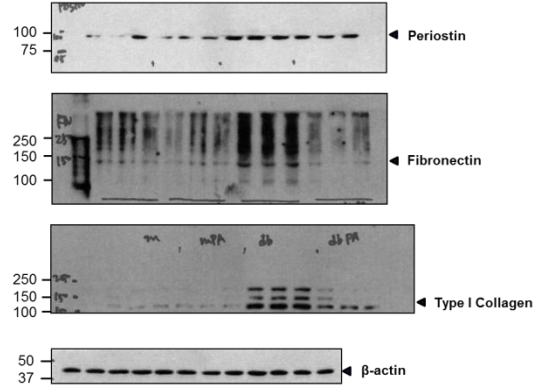

Supplementary Figure 4. Wider (uncropped) scans of blots (Figure 5B).
